# Supplementary material for: Silk sericin microcapsules with hydroxyapatite shells: protection and modification of organic microcapsules by biomimetic mineralization
Source: Royal Society of Chemistry journal article supplement (doi:10.1039/c5tb02328a), 2015-12-01
Supplement: c5tb02328a1.pdf [file c5tb02328a1.pdf]

## Supporting Information

### Silk Sericin Microcapsules with Hydroxyapatite Shell: Protection and Modification of Organic Microcapsules by Biomimetic Mineralization

W. H. Li,<sup>a</sup> Y. R. Cai,<sup>a</sup> Q. W. Zhong,<sup>a</sup> Y. Yang,<sup>a</sup> S. C. Kundu<sup>b</sup> and J. M. Yao<sup>\*a</sup>

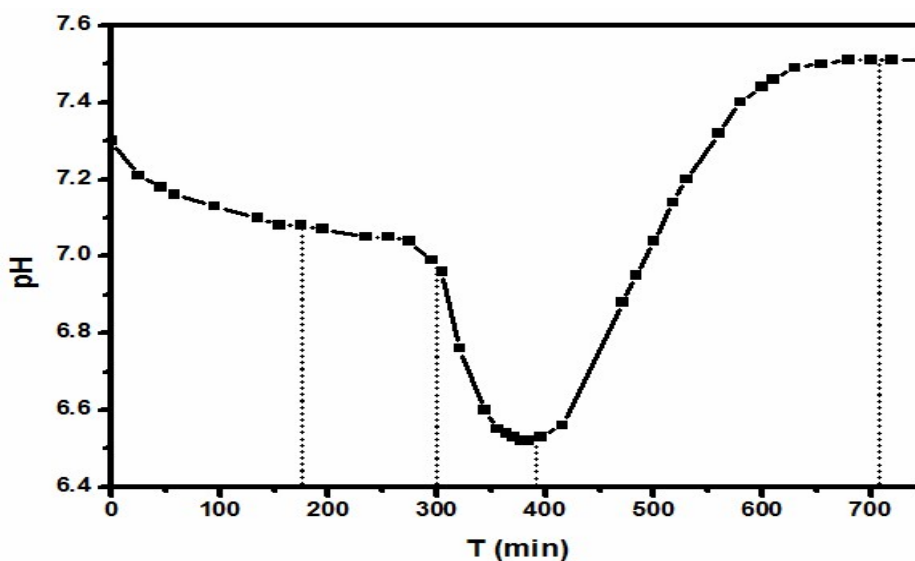

Fig. S1 The pH changes of the mineralized solution during the mineralized time under 37°C.

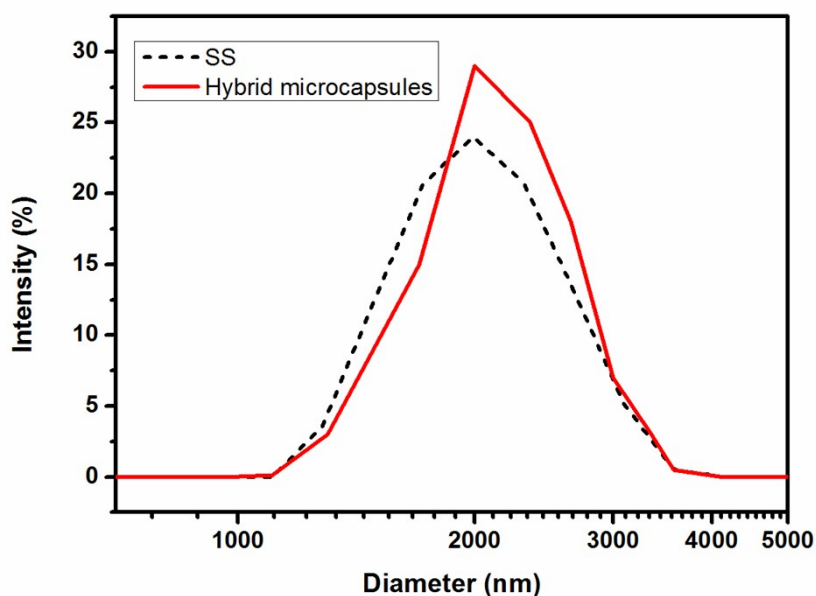

Fig. S2 The Size distribution of sericin microcapsules and hybrid microcapsules mineralized for 5h

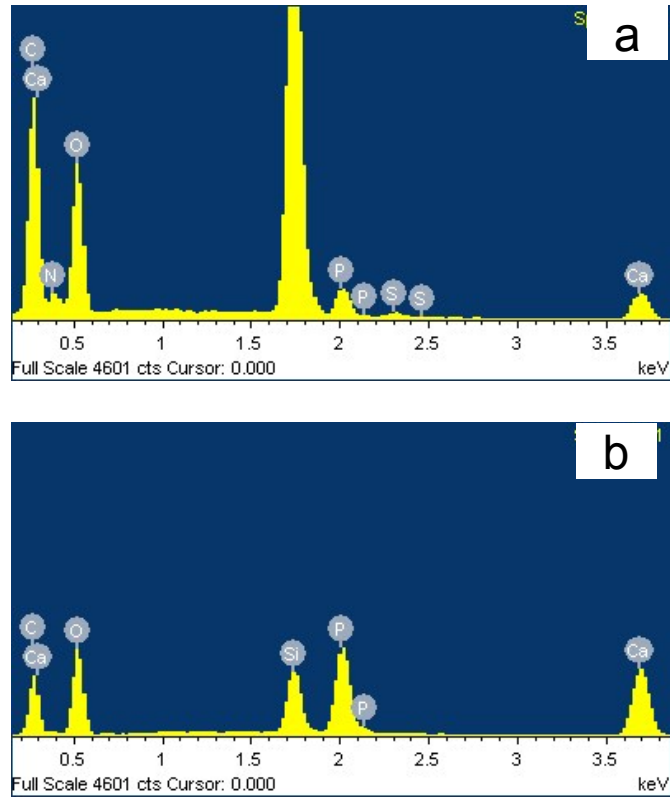

Fig. S3 The EDS spectrum of mineralization microcapsules (a) mineralized for 3 h, (b) 12 h.

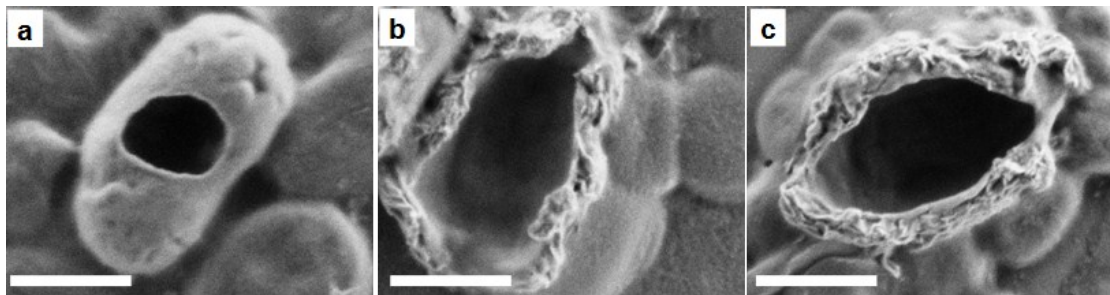

Fig. S4 The cross-section of the microcapsules after mineralization for (a) 0 h, (b) 5 h, (c) 12 h. The scale bar is 1  $\mu\text{m}$ .

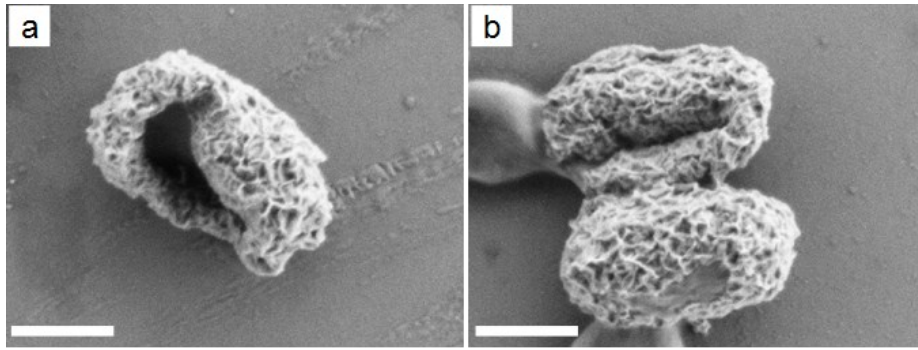

Fig. S5 The morphology of the hybrid microcapsule after incubating in (a) pH 7 for 7days, (b) 0.4 M NaCl solution for 7 days. The scale bar is 1  $\mu\text{m}$ .
